# Supplementary material for: Glucagon-Like Peptide-1 Receptor Agonist Treatment Attributes Important to Injection-Experienced Patients with Type 2 Diabetes Mellitus: A Preference Study in Germany and the United Kingdom
Source: Springer Nature journal article supplement (doi:10.1007/s13300-017-0237-8), 2017-02-24
Supplement: MOESM2 [file 12092042]

## Supplementary Figure

**Fig. S1** Description of preparation methods presented to participants in the DCE survey.

### Medication Feature #2: Preparation required

The amount of preparation required to use an injectable diabetes treatment can vary from one medication to another. The imaginary injectable diabetes treatments you will see in this survey have four possible preparations. These four different preparations are described below. Please read each of these carefully before moving to the next screen.

| <b>Preparation A<br/>(Multi-use pen)</b>                                                                                                                                                                                                                                                                                   | <b>Preparation B<br/>(Single-use pen)</b>                                                                                                                                                                                                                                                                                                                                                                                                                   | <b>Preparation C<br/>(Auto-injector)</b>                                                                                                                                                                                                                                                                     | <b>Preparation D<br/>(Vial &amp; syringe)</b>                                                                                                                                                                                                                                                                                                                          |
|----------------------------------------------------------------------------------------------------------------------------------------------------------------------------------------------------------------------------------------------------------------------------------------------------------------------------|-------------------------------------------------------------------------------------------------------------------------------------------------------------------------------------------------------------------------------------------------------------------------------------------------------------------------------------------------------------------------------------------------------------------------------------------------------------|--------------------------------------------------------------------------------------------------------------------------------------------------------------------------------------------------------------------------------------------------------------------------------------------------------------|------------------------------------------------------------------------------------------------------------------------------------------------------------------------------------------------------------------------------------------------------------------------------------------------------------------------------------------------------------------------|
| <ul style="list-style-type: none"> <li>○ Obtain needle</li> <li>○ Take the medication out of the refrigerator</li> <li>○ Attach the needle</li> <li>○ Select the dose using a dial</li> <li>○ Inject the medication</li> <li>○ Leave the needle in your skin for 6 seconds to ensure a full dose has been given</li> </ul> | <ul style="list-style-type: none"> <li>○ Take the medication out of the refrigerator and let it warm up for 15 minutes</li> <li>○ Attach the needle provided with the medication</li> <li>○ Combine the powder and liquid by twisting the knob</li> <li>○ Tap it up to 80 times on the palm of your hand to mix it</li> <li>○ Inject the medication</li> <li>○ Leave the needle in your skin for 10 seconds to ensure a full dose has been given</li> </ul> | <ul style="list-style-type: none"> <li>○ Take the medication out of the refrigerator and let it warm up for 15 minutes</li> <li>○ Shake it for 15 seconds to mix it</li> <li>○ Inject the medication</li> <li>○ Leave the needle in your skin for 15 seconds to ensure a full dose has been given</li> </ul> | <ul style="list-style-type: none"> <li>○ Take the medication out of the refrigerator</li> <li>○ Connect vial and syringe</li> <li>○ Combine powder in vial with liquid in syringe</li> <li>○ Shake it hard to mix it</li> <li>○ Draw mixed solution into syringe</li> <li>○ Attach the needle provided with the medication</li> <li>○ Inject the medication</li> </ul> |
